# Supplementary material for: ATP biphasically modulates LLPS of TDP-43 PLD by specifically binding arginine residues
Source: PubMed Central journal article supplement (PMC8192790; doi:10.1038/s42003-021-02247-2), 2021-06-10
Supplement: 42003_2021_2247_MOESM3_ESM.pdf [file 42003_2021_2247_MOESM3_ESM.pdf]

## **Description of Additional Supplementary Files**

**File name:** Supplementary Data 1

**Description:** Source data for all graphs and charts.
